# Supplementary material for: SARS-CoV-2 Morphometry Analysis and Prediction of Real Virus Levels Based on Full Recurrent Neural Network Using TEM Images
Source: MDPI journal article supplement (doi:10.3390/v14112386), 2022-10-28
Supplement: s1 [file s1]

| Sample | Area  | Width | Height | Circ. | AR   | Round | Solidity | Viruses |
|--------|-------|-------|--------|-------|------|-------|----------|---------|
| 1      | 18102 | 197   | 199    | 0.18  | 1.23 | 0.81  | 0.74     | 1       |
| 2      | 16057 | 259   | 242    | 0.13  | 1.19 | 0.84  | 0.68     | 1       |
| 3      | 10896 | 194   | 183    | 0.19  | 1.22 | 0.82  | 0.76     | 1       |
| 4      | 10264 | 155   | 191    | 0.28  | 1.16 | 0.86  | 0.87     | 1       |
| 5      | 11075 | 184   | 205    | 0.21  | 1.25 | 0.8   | 0.82     | 1       |
| 6      | 12182 | 200   | 193    | 0.22  | 1.17 | 0.85  | 0.77     | 1       |
| 7      | 11388 | 204   | 183    | 0.23  | 1.18 | 0.85  | 0.74     | 1       |
| 8      | 15800 | 227   | 204    | 0.31  | 1.18 | 0.85  | 0.81     | 1       |
| 9      | 14397 | 205   | 201    | 0.2   | 1.34 | 0.74  | 0.76     | 1       |
| 10     | 10139 | 184   | 176    | 0.28  | 1.05 | 0.96  | 0.79     | 1       |
| 11     | 13948 | 212   | 198    | 0.16  | 1.17 | 0.86  | 0.78     | 1       |
| 12     | 13444 | 217   | 180    | 0.13  | 1.22 | 0.82  | 0.78     | 1       |
| 13     | 12695 | 196   | 185    | 0.29  | 1.21 | 0.83  | 0.79     | 1       |
| 14     | 19889 | 200   | 173    | 0.17  | 1.18 | 0.85  | 0.76     | 1       |
| 15     | 17483 | 165   | 178    | 0.2   | 1.12 | 0.89  | 0.75     | 1       |
| 16     | 19740 | 213   | 185    | 0.26  | 1.08 | 0.92  | 0.77     | 1       |
| 17     | 18973 | 179   | 193    | 0.4   | 1.06 | 0.95  | 0.79     | 1       |
| 18     | 19007 | 162   | 182    | 0.42  | 1.18 | 0.85  | 0.86     | 1       |
| 19     | 16085 | 180   | 194    | 0.21  | 1.1  | 0.91  | 0.79     | 1       |
| 20     | 12417 | 214   | 193    | 0.14  | 1.27 | 0.79  | 0.75     | 1       |
| 21     | 24192 | 212   | 183    | 0.16  | 1.17 | 0.86  | 0.77     | 2       |
| 22     | 20102 | 197   | 199    | 0.18  | 1.23 | 0.81  | 0.74     | 2       |
| 23     | 21842 | 241   | 175    | 0.24  | 1.31 | 0.76  | 0.72     | 2       |
| 24     | 23369 | 219   | 185    | 0.19  | 1.22 | 0.82  | 0.76     | 2       |
| 25     | 26038 | 217   | 197    | 0.19  | 1.06 | 0.94  | 0.75     | 2       |
| 26     | 21331 | 189   | 198    | 0.18  | 1.05 | 0.95  | 0.8      | 2       |
| 27     | 25001 | 211   | 204    | 0.19  | 1.13 | 0.89  | 0.75     | 2       |
| 28     | 23044 | 210   | 186    | 0.17  | 1.13 | 0.88  | 0.77     | 2       |
| 29     | 23216 | 197   | 190    | 0.16  | 1.13 | 0.88  | 0.78     | 2       |
| 30     | 27394 | 193   | 231    | 0.16  | 1.26 | 0.8   | 0.81     | 2       |
| 31     | 24711 | 196   | 236    | 0.17  | 1.27 | 0.79  | 0.77     | 2       |
| 32     | 22899 | 193   | 201    | 0.32  | 1.12 | 0.89  | 0.82     | 2       |
| 33     | 23492 | 195   | 224    | 0.21  | 1.44 | 0.69  | 0.75     | 2       |
| 34     | 23759 | 246   | 210    | 0.17  | 1.22 | 0.82  | 0.72     | 2       |
| 35     | 25300 | 209   | 221    | 0.2   | 1.22 | 0.82  | 0.75     | 2       |
| 36     | 26856 | 213   | 241    | 0.13  | 1.17 | 0.86  | 0.76     | 2       |
| 37     | 24187 | 224   | 213    | 0.12  | 1.05 | 0.95  | 0.67     | 2       |
| 38     | 23567 | 206   | 196    | 0.23  | 1.2  | 0.84  | 0.8      | 2       |
| 39     | 21303 | 245   | 182    | 0.21  | 1.27 | 0.78  | 0.73     | 2       |
| 40     | 27495 | 201   | 232    | 0.16  | 1.29 | 0.77  | 0.76     | 2       |
| 41     | 35695 | 212   | 190    | 0.18  | 1.14 | 0.88  | 0.83     | 3       |
| 42     | 33599 | 214   | 192    | 0.14  | 1.05 | 0.95  | 0.74     | 3       |
| 43     | 30481 | 193   | 183    | 0.28  | 1.05 | 0.95  | 0.81     | 3       |
| 44     | 31268 | 199   | 172    | 0.27  | 1.1  | 0.91  | 0.8      | 3       |
| 45     | 32461 | 211   | 188    | 0.27  | 1.11 | 0.9   | 0.73     | 3       |
| 46     | 32290 | 195   | 175    | 0.37  | 1.17 | 0.85  | 0.83     | 3       |
| 47     | 34635 | 196   | 166    | 0.34  | 1.15 | 0.87  | 0.81     | 3       |

|    |       |     |     |      |      |      |      |   |
|----|-------|-----|-----|------|------|------|------|---|
| 48 | 33637 | 201 | 198 | 0.18 | 1.04 | 0.96 | 0.78 | 3 |
| 49 | 38821 | 268 | 245 | 0.13 | 1.13 | 0.89 | 0.78 | 3 |
| 50 | 39589 | 260 | 258 | 0.21 | 1.08 | 0.92 | 0.8  | 3 |
| 51 | 35030 | 257 | 238 | 0.34 | 1.21 | 0.83 | 0.84 | 3 |
| 52 | 32657 | 237 | 249 | 0.16 | 1.04 | 0.96 | 0.78 | 3 |
| 53 | 37946 | 303 | 260 | 0.2  | 1.09 | 0.92 | 0.67 | 3 |
| 54 | 32325 | 269 | 193 | 0.23 | 1.3  | 0.77 | 0.79 | 3 |
| 55 | 33067 | 206 | 192 | 0.21 | 1.33 | 0.75 | 0.81 | 3 |
| 56 | 35051 | 213 | 210 | 0.17 | 1.09 | 0.92 | 0.76 | 3 |
| 57 | 39404 | 197 | 225 | 0.38 | 1.14 | 0.88 | 0.88 | 3 |
| 58 | 35336 | 197 | 210 | 0.14 | 1.14 | 0.88 | 0.78 | 3 |
| 59 | 36309 | 190 | 193 | 0.2  | 1.21 | 0.83 | 0.84 | 3 |
| 60 | 35663 | 220 | 205 | 0.22 | 1.14 | 0.88 | 0.77 | 3 |
| 61 | 44788 | 207 | 196 | 0.2  | 1.16 | 0.86 | 0.78 | 4 |
| 62 | 45304 | 235 | 220 | 0.16 | 1.13 | 0.88 | 0.6  | 4 |
| 63 | 41877 | 190 | 206 | 0.2  | 1.09 | 0.92 | 0.77 | 4 |
| 64 | 41425 | 192 | 188 | 0.24 | 1.09 | 0.92 | 0.79 | 4 |
| 65 | 41373 | 183 | 220 | 0.27 | 1.15 | 0.87 | 0.73 | 4 |
| 66 | 41108 | 192 | 191 | 0.19 | 1.13 | 0.89 | 0.73 | 4 |
| 67 | 42544 | 219 | 192 | 0.2  | 1.02 | 0.98 | 0.78 | 4 |
| 68 | 46235 | 185 | 183 | 0.34 | 1.1  | 0.91 | 0.82 | 4 |
| 69 | 45216 | 208 | 211 | 0.29 | 1.23 | 0.81 | 0.75 | 4 |
| 70 | 42227 | 227 | 177 | 0.18 | 1.19 | 0.84 | 0.8  | 4 |
| 71 | 41863 | 193 | 189 | 0.21 | 1.13 | 0.88 | 0.81 | 4 |
| 72 | 46173 | 213 | 208 | 0.14 | 1.09 | 0.92 | 0.65 | 4 |
| 73 | 46125 | 195 | 164 | 0.19 | 1.21 | 0.82 | 0.82 | 4 |
| 74 | 45333 | 287 | 273 | 0.14 | 1.07 | 0.94 | 0.77 | 4 |
| 75 | 42494 | 298 | 258 | 0.14 | 1.12 | 0.89 | 0.77 | 4 |
| 76 | 40980 | 263 | 256 | 0.25 | 1.15 | 0.87 | 0.79 | 4 |
| 77 | 42775 | 288 | 265 | 0.11 | 1.12 | 0.89 | 0.75 | 4 |
| 78 | 42351 | 265 | 264 | 0.16 | 1.05 | 0.95 | 0.81 | 4 |
| 79 | 47264 | 297 | 239 | 0.31 | 1.28 | 0.78 | 0.8  | 4 |
| 80 | 46710 | 197 | 200 | 0.21 | 1.06 | 0.94 | 0.75 | 4 |
| 81 | 52831 | 196 | 193 | 0.26 | 1.12 | 0.89 | 0.78 | 5 |
| 82 | 56372 | 245 | 186 | 0.36 | 1.32 | 0.76 | 0.72 | 5 |
| 83 | 53485 | 220 | 212 | 0.2  | 1.04 | 0.96 | 0.79 | 5 |
| 84 | 53323 | 195 | 197 | 0.33 | 1.11 | 0.9  | 0.83 | 5 |
| 85 | 54255 | 196 | 179 | 0.36 | 1.34 | 0.74 | 0.86 | 5 |
| 86 | 53431 | 231 | 188 | 0.22 | 1.33 | 0.75 | 0.75 | 5 |
| 87 | 53472 | 212 | 172 | 0.29 | 1.13 | 0.88 | 0.81 | 5 |
| 88 | 54091 | 223 | 207 | 0.18 | 1.21 | 0.83 | 0.75 | 5 |
| 89 | 52509 | 210 | 214 | 0.17 | 1.2  | 0.84 | 0.74 | 5 |
| 90 | 54344 | 200 | 205 | 0.14 | 1.16 | 0.86 | 0.79 | 5 |
| 91 | 51845 | 193 | 189 | 0.31 | 1.19 | 0.84 | 0.83 | 5 |
| 92 | 53571 | 176 | 199 | 0.3  | 1.17 | 0.85 | 0.86 | 5 |
| 93 | 53637 | 186 | 180 | 0.25 | 1.07 | 0.93 | 0.79 | 5 |
| 94 | 52944 | 207 | 215 | 0.21 | 1.04 | 0.96 | 0.73 | 5 |
| 95 | 53484 | 261 | 219 | 0.14 | 1.12 | 0.89 | 0.64 | 5 |

|     |       |     |     |      |      |      |      |   |
|-----|-------|-----|-----|------|------|------|------|---|
| 96  | 54872 | 241 | 220 | 0.12 | 1.13 | 0.88 | 0.66 | 5 |
| 97  | 51189 | 181 | 191 | 0.21 | 1.08 | 0.92 | 0.81 | 5 |
| 98  | 51970 | 258 | 179 | 0.13 | 1.58 | 0.63 | 0.63 | 5 |
| 99  | 51757 | 233 | 181 | 0.17 | 1.3  | 0.77 | 0.76 | 5 |
| 100 | 54664 | 305 | 280 | 0.49 | 1.08 | 0.93 | 0.88 | 5 |

| Samples                   |    |
|---------------------------|----|
| Dataset_02_SARS-CoV-2_066 | 1  |
| Dataset_02_SARS-CoV-2_089 | 4  |
| Dataset_02_SARS-CoV-2_108 | 6  |
| Dataset_02_SARS-CoV-2_108 | 7  |
| Dataset_03_SARS-CoV-2_008 | 8  |
| Dataset_03_SARS-CoV-2_008 | 9  |
| Dataset_03_SARS-CoV-2_031 | 12 |
| Dataset_03_SARS-CoV-2_031 | 14 |
| Dataset_03_SARS-CoV-2_031 | 15 |
| Dataset_03_SARS-CoV-2_052 | 16 |
| Dataset_03_SARS-CoV-2_052 | 17 |
| Dataset_03_SARS-CoV-2_052 | 18 |
| Dataset_03_SARS-CoV-2_052 | 19 |
| Dataset_03_SARS-CoV-2_008 | 10 |
| Dataset_03_SARS-CoV-2_009 | 11 |
| Dataset_10_SARS-CoV-2_062 | 14 |
| Dataset_09_SARS-CoV-2_029 | 19 |
| Dataset_08_SARS-CoV-2_049 | 22 |
| Dataset_08_SARS-CoV-2_029 | 6  |
| Dataset_08_SARS-CoV-2_006 | 9  |
| Dataset_03_SARS-CoV-2_092 | 43 |
| Dataset_02_SARS-CoV-2_066 | 38 |
| Dataset_03_SARS-CoV-2_091 | 39 |
| Dataset_03_SARS-CoV-2_091 | 40 |
| Dataset_03_SARS-CoV-2_091 | 41 |
| Dataset_03_SARS-CoV-2_091 | 20 |
| Dataset_03_SARS-CoV-2_091 | 22 |
| Dataset_03_SARS-CoV-2_107 | 28 |
| Dataset_03_SARS-CoV-2_107 | 29 |
| Dataset_10_SARS-CoV-2_063 | 2  |
| Dataset_10_SARS-CoV-2_063 | 3  |
| Dataset_10_SARS-CoV-2_063 | 4  |
| Dataset_10_SARS-CoV-2_063 | 5  |
| Dataset_10_SARS-CoV-2_062 | 6  |
| Dataset_10_SARS-CoV-2_062 | 7  |
| Dataset_10_SARS-CoV-2_062 | 8  |
| Dataset_10_SARS-CoV-2_062 | 9  |
| Dataset_10_SARS-CoV-2_062 | 10 |
| Dataset_10_SARS-CoV-2_062 | 11 |
| Dataset_10_SARS-CoV-2_062 | 12 |
| Dataset_02_SARS-CoV-2_088 | 2  |
| Dataset_02_SARS-CoV-2_089 | 3  |
| Dataset_03_SARS-CoV-2_092 | 23 |
| Dataset_03_SARS-CoV-2_092 | 24 |
| Dataset_03_SARS-CoV-2_092 | 25 |
| Dataset_03_SARS-CoV-2_092 | 26 |
| Dataset_03_SARS-CoV-2_092 | 27 |

|                           |    |
|---------------------------|----|
| Dataset_03_SARS-CoV-2_092 | 42 |
| Dataset_03_SARS-CoV-2_031 | 13 |
| Dataset_07_SARS-CoV-2_049 | 44 |
| Dataset_07_SARS-CoV-2_049 | 45 |
| Dataset_07_SARS-CoV-2_035 | 30 |
| Dataset_07_SARS-CoV-2_058 | 32 |
| Dataset_07_SARS-CoV-2_085 | 35 |
| Dataset_09_SARS-CoV-2_101 | 1  |
| Dataset_09_SARS-CoV-2_101 | 2  |
| Dataset_10_SARS-CoV-2_012 | 3  |
| Dataset_09_SARS-CoV-2_084 | 4  |
| Dataset_09_SARS-CoV-2_076 | 5  |
| Dataset_09_SARS-CoV-2_092 | 15 |
| Dataset_02_SARS-CoV-2_089 | 5  |
| Dataset_10_SARS-CoV-2_062 | 13 |
| Dataset_10_SARS-CoV-2_062 | 15 |
| Dataset_10_SARS-CoV-2_062 | 16 |
| Dataset_10_SARS-CoV-2_062 | 17 |
| Dataset_10_SARS-CoV-2_062 | 18 |
| Dataset_10_SARS-CoV-2_062 | 19 |
| Dataset_08_SARS-CoV-2_049 | 21 |
| Dataset_08_SARS-CoV-2_049 | 23 |
| Dataset_08_SARS-CoV-2_049 | 25 |
| Dataset_08_SARS-CoV-2_029 | 1  |
| Dataset_08_SARS-CoV-2_029 | 2  |
| Dataset_08_SARS-CoV-2_006 | 11 |
| Dataset_07_SARS-CoV-2_049 | 31 |
| Dataset_07_SARS-CoV-2_058 | 33 |
| Dataset_07_SARS-CoV-2_085 | 36 |
| Dataset_07_SARS-CoV-2_086 | 37 |
| Dataset_10_SARS-CoV-2_063 | 1  |
| Dataset_09_SARS-CoV-2_029 | 17 |
| Dataset_10_SARS-CoV-2_062 | 20 |
| Dataset_09_SARS-CoV-2_076 | 6  |
| Dataset_09_SARS-CoV-2_076 | 7  |
| Dataset_09_SARS-CoV-2_007 | 8  |
| Dataset_09_SARS-CoV-2_007 | 9  |
| Dataset_09_SARS-CoV-2_007 | 10 |
| Dataset_09_SARS-CoV-2_004 | 11 |
| Dataset_09_SARS-CoV-2_005 | 12 |
| Dataset_09_SARS-CoV-2_056 | 13 |
| Dataset_09_SARS-CoV-2_056 | 14 |
| Dataset_09_SARS-CoV-2_092 | 16 |
| Dataset_09_SARS-CoV-2_029 | 18 |
| Dataset_09_SARS-CoV-2_029 | 20 |
| Dataset_08_SARS-CoV-2_049 | 24 |
| Dataset_08_SARS-CoV-2_029 | 3  |
| Dataset_08_SARS-CoV-2_029 | 4  |

|                           |    |
|---------------------------|----|
| Dataset_08_SARS-CoV-2_029 | 5  |
| Dataset_08_SARS-CoV-2_024 | 7  |
| Dataset_08_SARS-CoV-2_024 | 8  |
| Dataset_08_SARS-CoV-2_006 | 10 |
| Dataset_07_SARS-CoV-2_085 | 34 |
